# Supplementary material
Source: PubMed Central journal article supplement (PMC6439957)

## Supplementary Online Content

van der Linden V, de Lima Petribu NC, Pessoa A, et al. Association of severe hydrocephalus with congenital Zika syndrome. *JAMA Neurol*. Published online November 19, 2018. doi:10.1001/jamaneurol.2018.3553

**eTable 1.** Baseline Clinical Features.

**eTable 2.** Clinical features at the time of hydrocephalus diagnosis.

**eTable 3.** Main findings in CSF analysis.

**eFigure.** Representative brain image near birth and at diagnosis of hydrocephalus in patients with CZS.

This supplementary material has been provided by the authors to give readers additional information about their work.

**e-Table 1: Baseline Clinical Features.**

| Case | History of prenatal ultrasound abnormalities | Gestational age at birth | Birth weight for gestational age | Birth head circumference (HC) in cm | Z-score HC at birth | Microcephaly | Maternal rash | Craniofacial disproportion at birth | Prominence of occipital bone at birth | Redundant scalp skin at birth | Irritability during first months of life | Hyperexcitability | Arthrogryposis |
|------|----------------------------------------------|--------------------------|----------------------------------|-------------------------------------|---------------------|--------------|---------------|-------------------------------------|---------------------------------------|-------------------------------|------------------------------------------|-------------------|----------------|
| 1    | yes (30 wks)                                 | 35 wks                   | appropriate                      | 25cm                                | -4,36               | yes, severe  | 5 mo          | yes                                 | no                                    | yes                           | yes                                      | yes               | no             |
| 2    | yes (32 wks)                                 | 39 wks                   | appropriate                      | 29cm                                | -3,76               | yes, severe  | none          | yes                                 | yes                                   | yes                           | no                                       | no                | yes            |
| 3    | yes (28 wks)                                 | 37 wks                   | small                            | 27cm                                | -4,23               | yes, severe  | 3 mo          | yes                                 | yes                                   | yes                           | yes                                      | yes               | no             |
| 4    | yes (37 wks)                                 | 41 wks                   | appropriate                      | 29cm                                | -4,06               | yes, severe  | none          | yes                                 | yes                                   | yes                           | no                                       | no                | no             |
| 5    | yes (32 wks)                                 | 40 wks                   | appropriate                      | 27cm                                | -4,82               | yes, severe  | 2 mo          | yes                                 | yes                                   | yes                           | yes                                      | yes               | no             |
| 6    | yes (31 wks)                                 | 37 wks                   | appropriate                      | 29,5cm                              | -3,07               | yes          | 3 mo          | yes                                 | yes                                   | yes                           | yes                                      | yes               | yes            |
| 7    | yes (29 wks)                                 | 39 wks                   | appropriate                      | 28cm                                | -4,11               | yes, severe  | 3 mo          | yes                                 | yes                                   | yes                           | yes                                      | yes               | no             |
| 8    | yes (32 wks)                                 | 41 wks                   | appropriate                      | 27cm                                | -5,30               | yes, severe  | none          | yes                                 | yes                                   | yes                           | yes                                      | yes               | no             |

|    |              |        |             |      |       |             |      |     |     |     |     |     |     |
|----|--------------|--------|-------------|------|-------|-------------|------|-----|-----|-----|-----|-----|-----|
| 9  | yes (30 wks) | 40 wks | small       | 29cm | -3,82 | yes, severe | none | yes | yes | yes | yes | yes | yes |
| 10 | yes (36 wks) | 39 wks | appropriate | 30cm | -2,89 | yes         | 3 mo | yes | no  | no  | no  | yes | yes |
| 11 | yes (32 wks) | 35 wks | appropriate | 27cm | -3,52 | yes         | 3 mo | yes | yes | yes | yes | yes | no  |
| 12 | no           | 37 wks | small       | 28cm | -3,52 | yes, severe | none | yes | yes | yes | yes | yes | yes |
| 13 | no           | 37 wks | small       | 26cm | -4,71 | yes, severe | 4 mo | yes | yes | yes | no  | yes | yes |
| 14 | yes (27 wks) | 40 wks | appropriate | 24cm | -5,89 | yes, severe | 4 mo | yes | yes | yes | yes | yes | no  |
| 15 | yes (20 wks) | 40 wks | small       | 27cm | -4,82 | yes, severe | 3 mo | yes | yes | yes | no  | yes | no  |
| 16 | no           | 39 wks | appropriate | 27cm | -4,81 | yes, severe | no   | yes | yes | yes | yes | yes | no  |
| 17 | yes (37 wks) | 40 wks | appropriate | 29cm | -3,82 | yes         | 7 mo | yes | no  | yes | no  | yes | no  |
| 18 | yes (30 wks) | 39 wks | small       | 27cm | -4,60 | yes, severe | 6 mo | yes | yes | yes | no  | yes | no  |

|    |     |        |             |      |       |             |      |     |     |     |     |     |     |
|----|-----|--------|-------------|------|-------|-------------|------|-----|-----|-----|-----|-----|-----|
| 19 | no  | 31 wks | small       | 23cm | -3,56 | yes, severe | 3 mo | yes | no  | no  | no  | no  | no  |
| 20 | no  | 40 wks | appropriate | 27cm | -5,06 | yes, severe | none | yes | yes | yes | no  | no  | no  |
| 21 | no  | termo  | appropriate | 29cm | -3,82 | yes, severe | none | yes | yes | no  | no  | yes | no  |
| 22 | yes | 39 wks | small       | 27cm | -4,81 | yes, severe | none | yes | no  | yes | yes | yes | no  |
| 23 | no  | 41 wks | appropriate | 28cm | -4,85 | yes, severe | yes  | yes | no  | yes | yes | yes | yes |
| 24 | yes | 40 wks | appropriate | 27cm | -4,82 | yes, severe | yes  | yes | no  | no  | yes | yes | no  |

Cm = centimeters, wk = weeks

**e-Table 2:** Clinical features at the time of hydrocephalus diagnosis.

| Case | Age of diagnosis of hydrocephaly | Corrected age | Head circumference at the diagnosis of hydrocephaly | Z score of hc at the time of hydrocephalus diagnosis | Symptoms suggestive of hydrocephaly                                       | Clinical findings at the time of diagnosis of hydrocephaly |                  |                   |                          |                             |                                                                              |          |
|------|----------------------------------|---------------|-----------------------------------------------------|------------------------------------------------------|---------------------------------------------------------------------------|------------------------------------------------------------|------------------|-------------------|--------------------------|-----------------------------|------------------------------------------------------------------------------|----------|
|      |                                  |               |                                                     |                                                      |                                                                           | Hypertonia*                                                | Primitive reflex | Dysphagia         | Abnormal ocular movement | Visual fixation and pursuit | Milestones achieved (head control, sitting without support, voluntary grasp) | Epilepsy |
| 1    | 12 mo                            | 11 months     | 34 cm                                               | -7.82                                                | Vomiting, irritability and worsening of seizures                          | Yes                                                        | Present          | Yes, feeding tube | Strabismus, nystagmus    | No                          | Neither                                                                      | Yes      |
| 2    | 11 mo                            | Not applied   | 39,5 cm                                             | -5.29                                                | Drowsiness                                                                | Yes                                                        | Present          | Yes               | Nystagmus                | No                          | Neither                                                                      | Yes      |
| 3    | 3 mo                             | Not applied   | 33 cm                                               | -6.36                                                | Irritability and sutures disjunction                                      | Yes                                                        | Present          | Yes               | Nystagmus                | No                          | Neither                                                                      | Yes      |
| 4    | 12 mo                            | Not applied   | 42,7 cm                                             | -2.13                                                | Hypoactivity and increased hc                                             | Yes                                                        | Present          | Yes               | Strabismus               | No                          | Neither                                                                      | Yes      |
| 5    | 11 mo                            | Not applied   | 40,5 cm                                             | -3.39                                                | Increased hc, with no other symptoms, with 11 m                           | Yes                                                        | Present          | Yes               | Nystagmus                | No                          | Neither                                                                      | Yes      |
| 6    | 10 mo                            | Not applied   | 41,5 cm                                             | -3.48                                                | Irritability, worsening of seizures, increased hc and sutures disjunction | Yes                                                        | Present          | Yes               | Strabismus               | No                          | Neither                                                                      | Yes      |
| 7    | 11 mo                            | Not applied   | 37,4 cm                                             | -5.61                                                | Worsening of dysphagia and seizures                                       | Yes                                                        | Present          | Yes, feeding tube | Strabismus               | No                          | Neither                                                                      | Yes      |

|    |       |             |         |       |                                                                                         |     |         |                  |           |    |         |     |
|----|-------|-------------|---------|-------|-----------------------------------------------------------------------------------------|-----|---------|------------------|-----------|----|---------|-----|
|    |       |             |         |       | with vomiting.                                                                          |     |         |                  |           |    |         |     |
| 8  | 4 mo  | Not applied | 41 cm   | -0.53 | Irritability and increased hc                                                           | Yes | Present | Yes              | Nystagmus | No | Neither | Yes |
| 9  | 13 mo | Not applied | 36,8 cm | -6.73 | None                                                                                    | Yes | Present | Yes              | Nystagmus | No | Neither | No  |
| 10 | 11 mo | Not applied | 42 cm   | -1.91 | Increased hc, vomiting and worsening of seizures                                        | Yes | Present | Yes              | No        | No | Neither | Yes |
| 11 | 11 mo | 10 months   | 39 cm   | -5.29 | Irritability , vomiting and uncontrolled seizures                                       | Yes | Present | Yes, gastrostomy | Nystagmus | No | Neither | Yes |
| 12 | 12 mo | Not applied | 38 cm   | -5.07 | Worsening of the seizures at 9 months, worsening of dysphagia and respiratory symptoms. | Yes | Present | Yes              | Nystagmus | No | Neither | Yes |
| 13 | 14 mo | Not applied | 36 cm   | -8.14 | Vomiting                                                                                | Yes | Present | Yes              | Nystagmus | No | Neither | Yes |
| 14 | 14 mo | Not applied | 37 cm   | -6.16 | Worsening of seizures, hypertension.                                                    | Yes | Present | Yes              | Nystagmus | No | Neither | Yes |
| 15 | 14 mo | Not applied | 38 cm   | -5.43 | Vomiting; irritability; worsening of dysphagia                                          | Yes | Present | Yes              | No        | No | Neither | Yes |

|    |           |             |              |              |                                            |     |         |     |                               |     |         |     |
|----|-----------|-------------|--------------|--------------|--------------------------------------------|-----|---------|-----|-------------------------------|-----|---------|-----|
| 16 | 14 mo     | Not applied | 34 cm        | -9.68        | Vomiting; worsening of dysphagia; seizures | Yes | Present | Yes | Nystagmus                     | No  | Neither | Yes |
| 17 | 18 mo     | Not applied | 40,5 cm      | -416         | None                                       | Yes | Present | Yes | No                            | No  | Neither | Yes |
| 18 | 15 mo     | Not applied | 37,2 cm      | -6.16        | Vomiting and worsening of seizures         | Yes | Present | Yes | Strabismus                    | No  | Neither | Yes |
| 19 | 16 mo     | 14 mo       | 35 cm        | -8.91        | Worsening of seizures                      | Yes | Present | Yes | Strabismus, nystagmus         | No  | Neither | Yes |
| 20 | 12 mo     | Not applied | 34 cm        | -9.39        | Worsening of seizures                      | Yes | Present | Yes | Tendencia a olhar p esquerda  | No  | Neither | Yes |
| 21 | 18 mo     | Not applied | 39,2cm       | -524         | Worsening of seizures; sleep disorders     | Yes | Present | Yes | No                            | No  | Neither | Yes |
| 22 | 9 months  | Not applied | 40           | -3,91        | Increased seizures; drowsiness             | Yes | Present | Yes | No                            | No  | Neither | Yes |
| 23 | 9 months  | Not applied | 37           | -6,42        | Drowsiness and vertical gaze palsy         | Yes | Present | Yes | Exotropia, nystagmus, up beat | No  | Neither | Yes |
| 24 | 13 months | Not applied | Not analysed | Not analysed | Vomiting; irritability                     | Yes | Present | Yes | No                            | Yes | Neither | Yes |

\*abnormalities include arthrogryposis with mixture of hypotonia and hypertonia (case 2, 6, 9, 10, 12, 13, 23)

**e-Table 3:** Main findings in CSF analysis.

| Case | CSF routine      |                  | Proteins electrophoretic separation |             |                     |                     |                   |                   |
|------|------------------|------------------|-------------------------------------|-------------|---------------------|---------------------|-------------------|-------------------|
|      | cel count (/mm3) | proteins (mg/dl) | Prealbumin (%)                      | Albumin (%) | Alfa 1 globulin (%) | Alfa 2 globulin (%) | Beta globulin (%) | Gama globulin (%) |
| 1    | na               | 65 (hemolyzed)   | 3                                   | 53          | 4                   | 6                   | 202               | 12                |
| 2    | na               | 17               | 3                                   | 57          | 4                   | 7                   | 19                | 10                |
| 3    | na               | na               | na                                  | na          | na                  | na                  | na                | na                |
| 4    | na               | 48               | 4                                   | 52          | 6                   | 7                   | 19                | 12                |
| 5    | na               | 55               | 2                                   | 47          | 4                   | 5                   | 28                | 14                |
| 6    | na               | 10               | 10                                  | 47          | 4                   | 5                   | 26                | 8                 |
| 7    | na               | 37               | 2                                   | 61          | 3                   | 4                   | 20                | 10                |
| 8    | na               | na               | na                                  | na          | na                  | na                  | na                | na                |
| 9    | na               | 26               | 2                                   | 55          | 5                   | 7                   | 21                | 10                |
| 10   | na               | 18               | 5                                   | 55          | 3                   | 6                   | 19                | 12                |
| 11   | na               | 52               | na                                  | na          | na                  | na                  | na                | na                |
| 12   | na               | 13               | 3                                   | 46          | 6                   | 8                   | 27                | 10                |
| 13   | na               | 35               | 3                                   | 45          | 6                   | 10                  | 26                | 10                |
| 14   | na               | 12               | 3                                   | 59          | 4                   | 7                   | 17                | 10                |
| 15   | na               | 65 (hemolyzed)   | 5                                   | 42          | 4                   | 7                   | 27                | 15                |
| 16   | 1                | 23               | na                                  | na          | na                  | na                  | na                | na                |
| 17   | 4                | 52               | 3                                   | 55          | 3                   | 6                   | 20                | 11                |
| 18   | 1                | 20               | 3                                   | 54          | 5                   | 7                   | 18                | 13                |



|    |    |    |    |    |    |    |    |    |
|----|----|----|----|----|----|----|----|----|
| 19 | na |
| 20 | na |
| 21 | 1  | 45 | 13 | 48 | 5  | 6  | 16 | 12 |

**eFigure.** Representative brain image near birth and at diagnosis of hydrocephalus in patients with CZS. (A-H) Follow-up images illustrate worsening cerebral volume loss and increased ventricular dilation consistent with hydrocephalus (at birth on top and at the diagnosis of hydrocephalus on bottom).

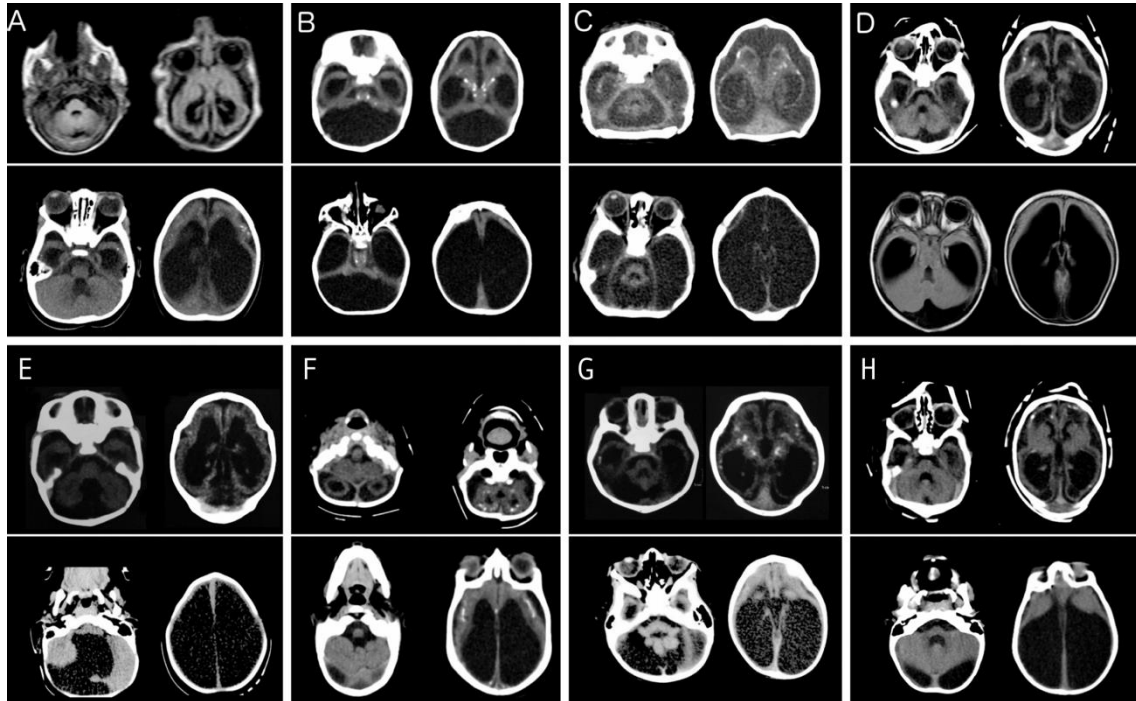

Supplement: jamaneurol-76-203-s001.pdf [file jamaneurol-76-203-s001.pdf]
